# Supplementary material
Source: Springer Nature journal article supplement (https://www.springermedizin.de/resource/supplementary/12913_2008_895_MOESM1_ESM.pdf/9536390)

First Sulfonylurea Therapy (N=1640)

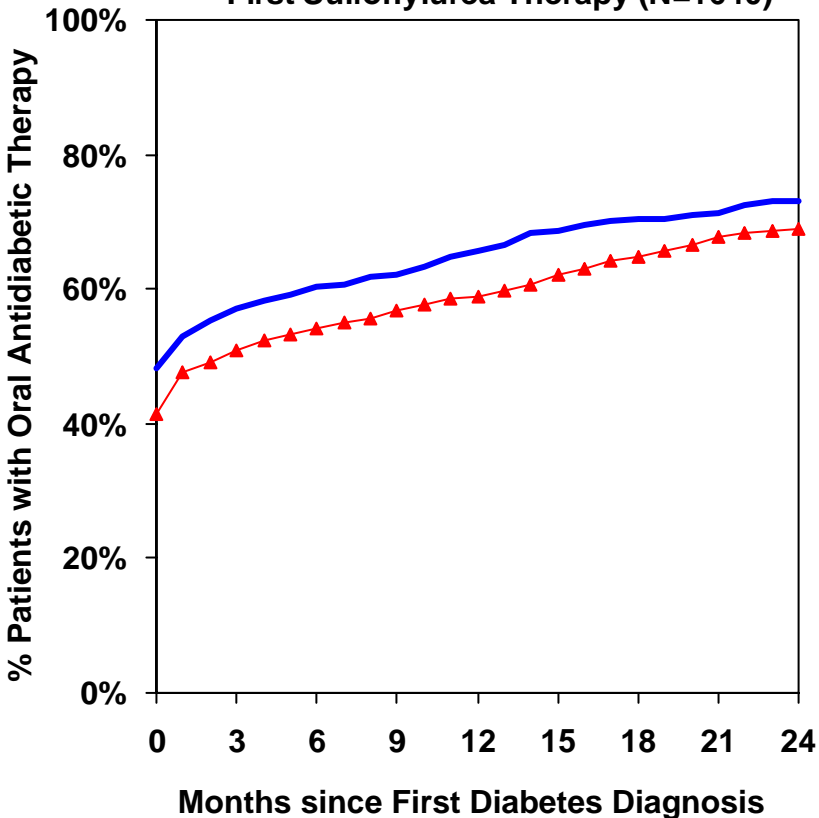

First Metformin Therapy (n=266)

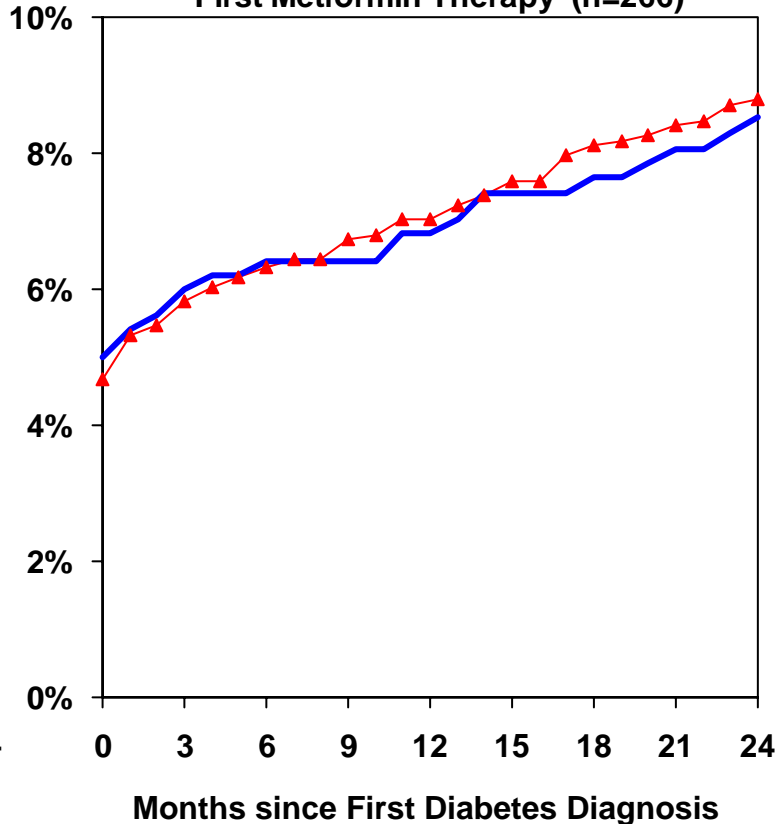

Black White

Supplement: MOESM1 [file 9536390]
